# Supplementary material for: Peptide Characterization and Functional Stability of a Partially Hydrolyzed Whey-Based Formula over Time
Source: MDPI journal article supplement (doi:10.3390/nu13093011), 2021-08-28
Supplement: s1 [file s1]

|               | Brand                   | Product name             | Batch numbers                           | Protein source  |
|---------------|-------------------------|--------------------------|-----------------------------------------|-----------------|
| <b>pHF-W2</b> | <b>Humana</b>           | HA1                      | 0022L-04.2014-21381878-02-07:15-008638  | Hydrolyzed whey |
|               | Humana                  | HA1                      | LL10G-09.10.10-21116993-01-20:20-000842 | Hydrolyzed whey |
|               | Humana                  | HA pre                   | MM25A-07.2011-21147998-01-09:09-003254  | Hydrolyzed whey |
|               | Humana                  | HA1                      | LL23I-03-2011-2128344-01-15:54-002366   | Hydrolyzed whey |
| <b>pHF-W4</b> | <b>Milupa</b>           | Aptamil HA 1             | 08.05.2014 C2 277239 001711             | Hydrolyzed whey |
|               | Milupa                  | Aptamil HA 1             | 24-05.2014 C1 277181 000671             | Hydrolyzed whey |
|               | Milupa                  | Aptamil HA 1             | 01.03.2011 L:3342232                    | Hydrolyzed whey |
|               | Milupa                  | Aptamil HA pre           | 22.01.2001 L:2952007                    | Hydrolyzed whey |
|               | Milupa                  | Aptamil HA pre           | 07.05.2009 L:3110816                    | Hydrolyzed whey |
|               | Milupa                  | Aptamil HA 1             | 26.05.2009 L3301759                     | Hydrolyzed whey |
|               | Milupa                  | Aptamil HA1              | 28-04-2011 C1 272572 000440             | Hydrolyzed whey |
| <b>PHF-W3</b> | <b>Hipp</b>             | HA plus Probiotik HA1    | 02.2011 L651110054 13:52 D              | Hydrolyzed whey |
|               | Hipp                    | HA1 Combiotik HA1        | 25.10.2013 21359978                     | Hydrolyzed whey |
|               | Hipp                    | HA1 Combiotik HA1        | 25.10.2013 21359978                     | Hydrolyzed whey |
|               | Hipp                    | HA plus Probiotiks preHA | 10.2010 L651100020                      | Hydrolyzed whey |
|               | Hipp                    | HA1                      | 21351391                                | Hydrolyzed whey |
| <b>PHF-W1</b> | <b>Nestlé Nutrition</b> | BEBA HA2                 | 2011 BEH 007, DEWBPKJAS                 | Hydrolyzed whey |
|               | Nestlé Nutrition        | BEBA HA1                 | 2003 NAH 042, DEWBRRRPAZ                | Hydrolyzed whey |
|               | Nestlé Nutrition        | GOOD START               | 2004 NWH001A-00S, 4265EWGPP1539 2212    | Hydrolyzed whey |
|               | Nestlé Nutrition        | GOOD START               | 2004 NHW005-00, 4200EWG1P1433 0627      | Hydrolyzed whey |
|               | Nestlé Nutrition        | NAN HA2                  | 2002 DEWBUSKAU                          | Hydrolyzed whey |
|               | Nestlé Nutrition        | BEBA HA1                 | 2005 NWHB 020-1, L-60760742CV           | Hydrolyzed whey |
|               | Nestlé Nutrition        | NAN HA2 Milk Powder      | 2010 021107421B                         | Hydrolyzed whey |
|               | Nestlé Nutrition        | NAN HA2 Milk Powder      | 2010 0356074228                         | Hydrolyzed whey |
|               | Nestlé Nutrition        | NAN HA2 BL Gold          | 2009 9210074227                         | Hydrolyzed whey |
|               | Nestlé Nutrition        | NAN HA2 BL Gold          | 2010 00250742B5                         | Hydrolyzed whey |
|               | Nestlé Nutrition        | NAN HA2 BL Gold          | 2009 901807422X                         | Hydrolyzed whey |
|               | Nestlé Nutrition        | NAN HW Three BL Gold     | 2010 0038007421K                        | Hydrolyzed whey |
|               | Nestlé Nutrition        | NAN HA3 BL               | 2008 834507421M                         | Hydrolyzed whey |
|               | Nestlé Nutrition        | NAN HA3 BL               | 2009 918807421P                         | Hydrolyzed whey |
|               | Nestlé Nutrition        | NAN HA3 BL Gold          | 2011 10080742BK                         | Hydrolyzed whey |
|               | Nestlé Nutrition        | NAN HW BL Gold           | 2010 0203074211                         | Hydrolyzed whey |
|               | Nestlé Nutrition        | NAN HA1 B                | 2009 93030742AC                         | Hydrolyzed whey |
|               | Nestlé Nutrition        | BEBA HA START Pro B      | 2010 01290742BW                         | Hydrolyzed whey |
|               | Nestlé Nutrition        | BEBA HA START Pro B      | 2010 03410742AT                         | Hydrolyzed whey |
|               | Nestlé Nutrition        | NAN HA1 B                | 2009 913907421X                         | Hydrolyzed whey |
|               | Nestlé Nutrition        | BEBA HA1 B               | 2008 835607422C                         | Hydrolyzed whey |
|               | Nestlé Nutrition        | NAN-HA NWHB222           | 2010 L11867800292                       | Hydrolyzed whey |
|               | Nestlé Nutrition        | NAN-HA NWHB022-5A        | 040006664361 L025207423R                | Hydrolyzed whey |
|               | Nestlé Nutrition        | NAN-HA NWHB200           | 118677 00085                            | Hydrolyzed whey |
|               | Nestlé Nutrition        | BEBA pro-HA NWHB022-5A   | L013107424AW 040006254856 13833960      | Hydrolyzed whey |
|               | Nestlé Nutrition        | BEBA HA1                 | L21080742C1                             | Hydrolyzed whey |
| <b>IF</b>     |                         |                          |                                         |                 |
|               | Nestlé Nutrition        | Béba1 OPTIPRO            | 9097080622/NWSB007-100233940            | Whey : casein   |
| <b>eHF-W</b>  |                         |                          |                                         |                 |
|               | Nestlé Health Science   | Althera                  | 2012                                    | Hydrolyzed whey |
